# Supplementary material for: Physiological phenotyping of mammalian cell lines by enzymatic activity fingerprinting of key carbohydrate metabolic enzymes: a pilot and feasibility study
Source: BMC Res Notes. 2019 Oct 22;12:682. doi: 10.1186/s13104-019-4697-y (PMC6805439; doi:10.1186/s13104-019-4697-y)
Supplement: Supplementary file 1 — Additional file 1. Enzyme activity assay excel template: excel file for enzyme activity assay setup support. The file contains a blank layout sheet for test sample and control sample distribution on a 96-well plate. Additional sheets contain master mix volume calculations for activity assays for Aldolase, Glucose-6-phosphate Dehydrogenase, Hexokinase, Phosphofructokinase, Phosphoglucose isomerase, and Phosphoglucosemutase. Adjustment of the desired number of control and test samples (grey fields) results in recalculation of required volumes. All sheets are printable on A4 paper and can be filled out digitally or manually. https://doi.org/10.6084/m9.figshare.7859801. [file 13104_2019_4697_MOESM1_ESM.xlsx]

## Sheet: Table of contents
Table of contents
Sheet name	Description
layout_96w	General layout template for documenting sample distribution in assays
Aldolase	Master mix calculations for Aldolase assay
G6PDH	Master mix calculations for G6PDH assay
HXK	Master mix calculations for HXK assay
PFK	Master mix calculations for PFK assay
PGI	Master mix calculations for PGI assay
PGM	Master mix calculations for PGM assay
FK	Master mix calculations for FK assay

## Sheet: layout_96w
Enzyme assay 96w layout
Method name:				Experiment:			Analyst:			Date:
Layout for a 96w plate
	1	2	3	4	5	6	7	8	9	10	11	12
A
B
C
D
E
F
G
H
	white fields = samples; grey fields = control samples
	Example: Distribution of sample replica					Remarks:
	Replica.1
	Replica.2
	Replica.3
	No substrate Control

## Sheet: Aldolase
Protocol sheet for Aldolase activity assay					Experiment:			Analyst:			Date:
Hint: Adjust for sample numbers in the grey fields!
Reaction volume	160	µL		wavelenght	340	nm		REMARKS:
Extract, volume	5	µL		temperature	30	°C		0,5 for calculation as one substrate molecule
No of substrate reactions (NOSR)	50							is converted into two molecules that go
No. of control reations (w/o substrate, NOCR))	18							down to NADH consumption!
Component	Stock Concentration		volume per reaction		Master mix preparation volumes
					NOSR	NOSR	NOCR	NOCR	final Concentration
						Vol. in µL		Vol in µL
Tris-HCL (pH= 8.0)	1	M	16	µL	50	800	18	288	0.1	M
EDTA	0.25	M	0.64	µL	50	32	18	11.52	0.001	M
MgCl2	0.5	M	1.6	µL	50	80	18	28.8	0.005	M
Fruct-1,6-bisP*	25	mM	6.4	µL	50	320	-	-	1	mM
NADH	25	mM	0.96	µL	50	48	18	17.28	0.15	mM
GPDH	2100	U/mL	0.381	µL	50	19.05	18	6.858	0.8001	U/mL
TPI	6000	U/mL	0.08	µL	50	4	18	1.44	0.48	U/mL
Sample volume			5	µL
Water			128.939	µL		6446.95		2436.1
* indicates substrate absent in controls
Notes:

## Sheet: G6PDH
Protocol sheet for Glucose-6-phosphate Dehydrogenase Activity assay					Experiment:			Analyst:			Date:
Hint: Adjust for sample numbers in the grey fields!
Reaction volume	160	µL		wavelenght	340	nm
Extract, volume	5	µL		temperature	30	°C
No of substrate reactions (NOSR)	50
No. of control reations (w/o substrate, NOCR))	18
Component	Stock Concentration		volume per reaction		Master mix preparation volumes
					NOSR	NOSR	NOCR	NOCR	final Concentration
						Vol. in µL		Vol in µL
Tris-HCl pH 7,6	1	M	16	µL	50	800	18	288	0.1	M
MgCl2	0.5	M	1.6	µL	50	80	18	28.8	0.005	M
Glc-6-P* (G6P)	100	mM	1.6	µL	50	80	-	-	1	mM
NADP	10	mM	6.4	µL	50	320	18	115.2	0.4	mM
Sample volume			5	µL
Water			129.4	µL		6470		2358
* indicates substrate absent in controls
Notes:

## Sheet: HXK
Protocol sheet for Hexokinase activity assay					Experiment:			Analyst:			Date:
Hint: Adjust for sample numbers in the grey fields!
Reaction volume	160	µL		wavelenght	340	nm
Extract, volume	5	µL		temperature	30	°C
No of substrate reactions (NOSR)	50
No. of control reations (w/o substrate, NOCR))	18
Component	Stock Concentration		volume per reaction		Master mix preparation volumes
					NOSR	NOSR	NOCR	NOCR	final Concentration
						Vol. in µL		Vol in µL
Bis-Tris pH 8,0	100	mM	80	µL	50	4000	18	1440	50	mM
MgCl2	0.5	M	1.6	µL	50	80	18	28.8	0.005	M
Glucose*	100	mM	8	µL	50	400	-	-	5	mM
NAD	50	mM	3.2	µL	50	160	18	57.6	1	mM
ATP	100	mM	4	µL	50	200	18	72	2.5	mM
G6PDH	6000	U/mL	0.14	µL	50	7	18	2.52	5.25	U/mL
Sample volume			5	µL
Water			58.06	µL		2903		1189.08
* indicates substrate absent in controls
Notes:

## Sheet: PFK
Protocol sheet for Phosphofructokinase activity assay					Experiment:			Analyst:			Date:
Hint: Adjust for sample numbers in the grey fields!
Reaction volume	160	µL		wavelenght	340	nm		REMARKS:
Extract, volume	5	µL		temperature	30	°C		0,5 for calculation as one substrate molecule
No of substrate reactions (NOSR)	50							is converted into two molecules that go
No. of control reations (w/o substrate, NOCR))	18							down to NADH consumption!
Component	Stock Concentration		volume per reaction		Master mix preparation volumes
					NOSR	NOSR	NOCR	NOCR	final Concentration
						Vol. in µL		Vol in µL
Tris HCL.pH 8,0	1	M	8	µL	50	400	18	144	0.05	M
EDTA	0.25	M	0.64	µL	50	32	18	11.52	0.001	M
MgCl2	0.5	M	1.6	µL	50	80	-	28.8	0.005	M
Fruct-6-P*	100	mM	1.6	µL	50	80	-	-	1	mM
NADH	25	mM	0.96	µL	50	48	18	17.28	0.15	mM
ATP	100	mM	0.32	µL	50	16	18	5.76	0.2	mM
Aldolase	372	U/mL	0.43	µL	50	21.5	18	7.74	0.99975	U/mL
GPDH	2100	U/mL	0.381	µL	50	19.05	18	6.858	5.00063	U/mL
TPI	6000	U/mL	0.08	µL	50	4	18	1.44	3	U/mL
Sample volume			5	µL
Water			140.989	µL		7049.45		2566.6
* indicates substrate absent in controls
Notes:

## Sheet: PGI
Protocol sheet for Phosphoglucose isomerase Activity assay					Experiment:			Analyst:			Date:
Hint: Adjust for sample numbers in the grey fields!
Reaction volume	160	µL		wavelenght	340	nm
Extract, volume	5	µL		temperature	30	°C
No of substrate reactions (NOSR)	50
No. of control reations (w/o substrate, NOCR))	18
Component	Stock Concentration		volume per reaction		Master mix preparation volumes
					NOSR	NOSR	NOCR	NOCR	final Concentration
						Vol. in µL		Vol in µL
Tris-HCl pH 8,0	1	M	16	µL	50	800	18	288	0.1	M
MgCl2	0.5	M	1.28	µL	50	64	18	23.04	0.004	M
DTT	500	mM	1.28	µL	50	64	18	23.04	4	mM
Fruct-6-P*	100	mM	3.2	µL	50	160	-	-	2	mM
NAD	50	mM	0.8	µL	50	40	18	14.4	0.25	mM
G6PDH	6000	U/mL	0.054	µL	50	2.7	18	0.972	2.025	U/mL
Sample volume			5	µL
Water			132.386	µL		6619.3		2440.55
* indicates substrate absent in controls
Notes:

## Sheet: PGM
Protocol sheet for Phosphoglucomutase activity assay					Experiment:			Analyst:			Date:
Hint: Adjust for sample numbers in the grey fields!
Reaction volume	160	µL		wavelenght	340	nm
Extract, volume	5	µL		temperature	30	°C
No of substrate reactions (NOSR)	50
No. of control reations (w/o substrate, NOCR))	18
Component	Stock Concentration		volume per reaction		Master mix preparation volumes
					NOSR	NOSR	NOCR	NOCR	final Concentration
						Vol. in µL		Vol in µL
Tris-HCl pH 8,0	1	M	3.2	µL	50	160	18	57.6	0.02	M
MgCl2	0.5	M	3.2	µL	50	160	18	57.6	0.01	M
DTT	500	mM	1.28	µL	50	64	18	23.04	4	mM
Glc-1,6-bisP	10	mM	1.6	µL	50	80	18	28.8	0.1	mM
Glc-1-P*	100	mM	4.8	µL	50	240	-	-	3	mM
NAD	50	mM	0.8	µL	50	40	18	14.4	0.25	mM
G6PDH	6000	U/mL	0.11	µL	50	5.5	18	1.98	4.125	U/mL
Sample volume			5	µL
Water			140.01	µL		7000.5		2606.58
* indicates substrate absent in controls
Notes:
